# Supplementary material
Source: PubMed Central journal article supplement (PMC7183768)
Supplement: NIHMS1581264-supplement-Supplementary_data.pdf [file NIHMS1581264-supplement-Supplementary_data.pdf]

**Fig. S2. Granisetron restored Ca<sup>2+</sup> homeostasis by modulating CREB pathway in the brains of C57Bl/6J aged mice.** Data are presented as mean±SEM of 5 mice in each group. Statistical analysis was determined by Student's t-test. \*P<0.05 and \*\*P<0.01 versus control group.

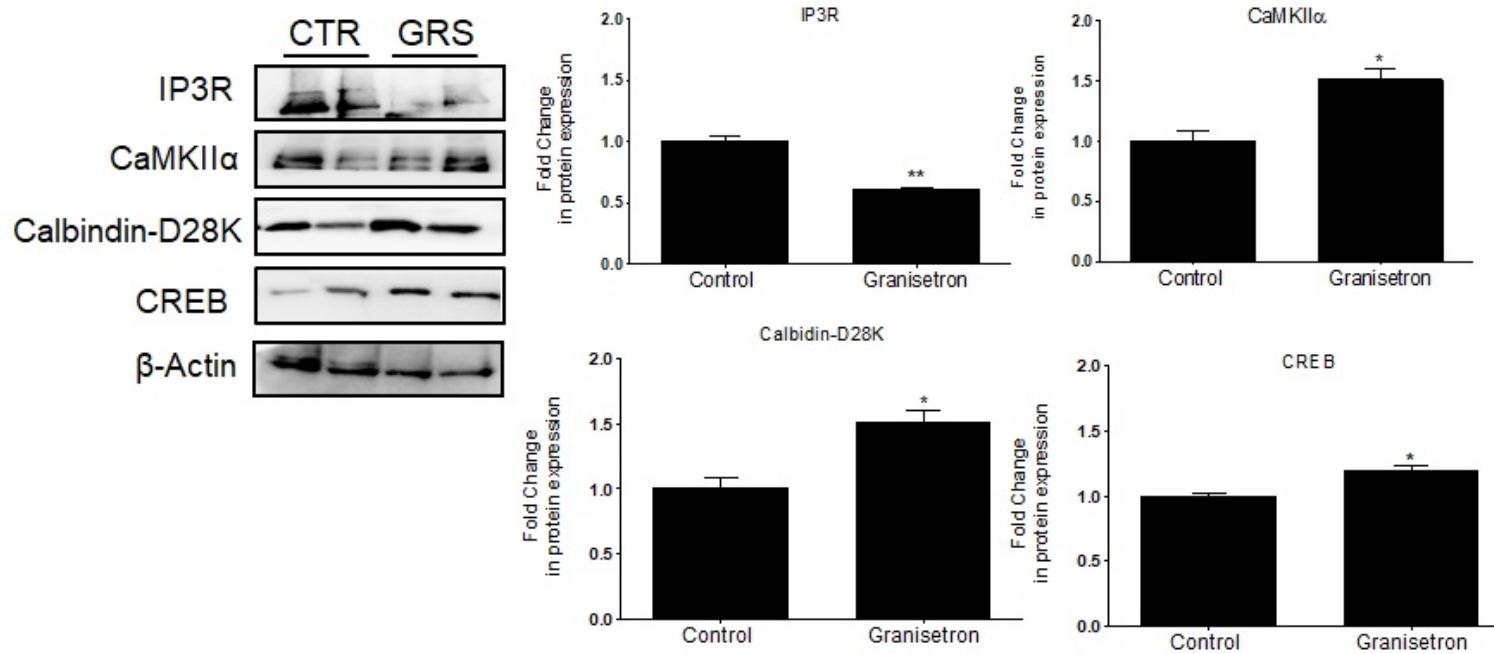

**Fig. S3.** Individual red and green channels for Panels D and E of Figure 4. These images are representative hippocampus sections stained with Thio-S (green) to detect A $\beta$  plaques load and anti-collagen IV (red) to stain microvessels from control and granisetron treated groups.

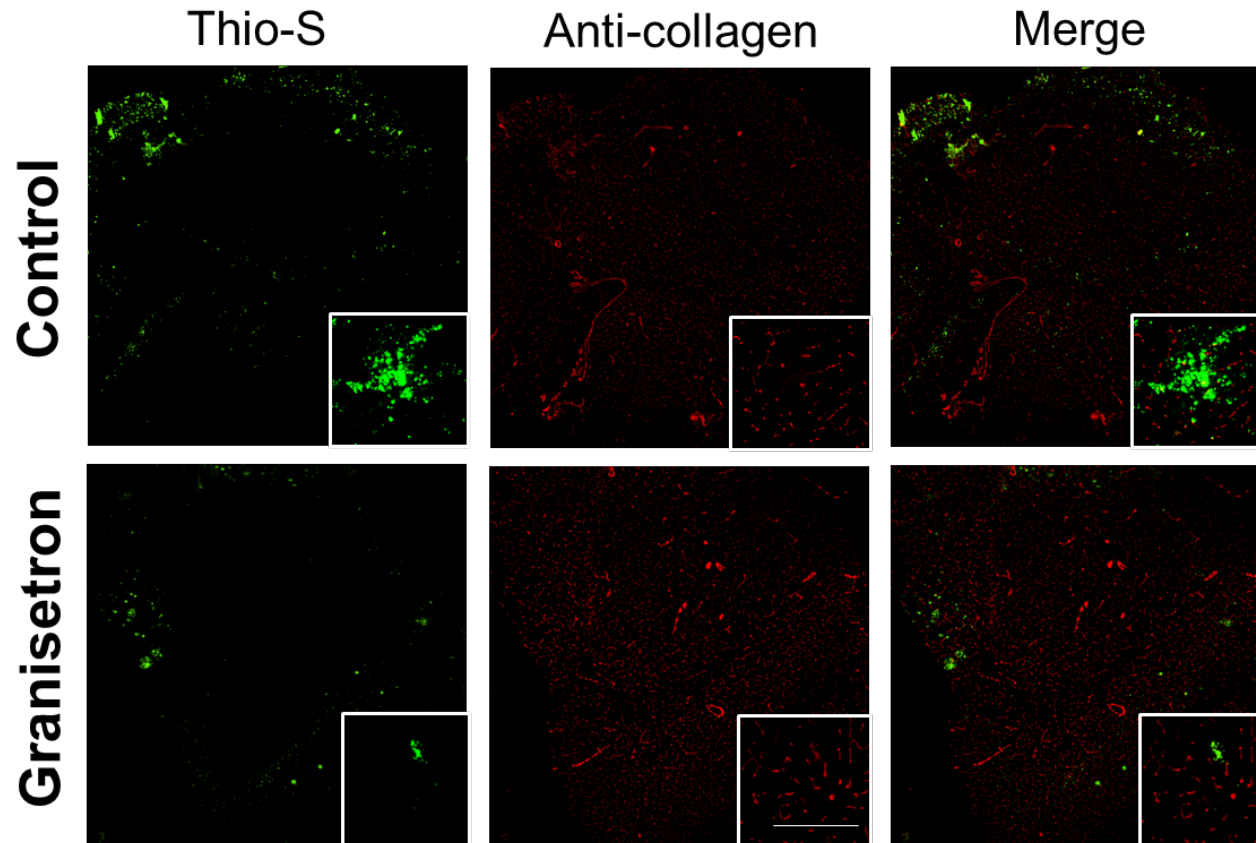

**Fig. S4.** Individual red and green channels for Panel A of Figure 6. These images are representative brain sections stained with 6E10 (green) antibody to detect A $\beta$ , and anti-GFAP (red) antibody to detect activated astrocytes in control and granisetron treated groups.

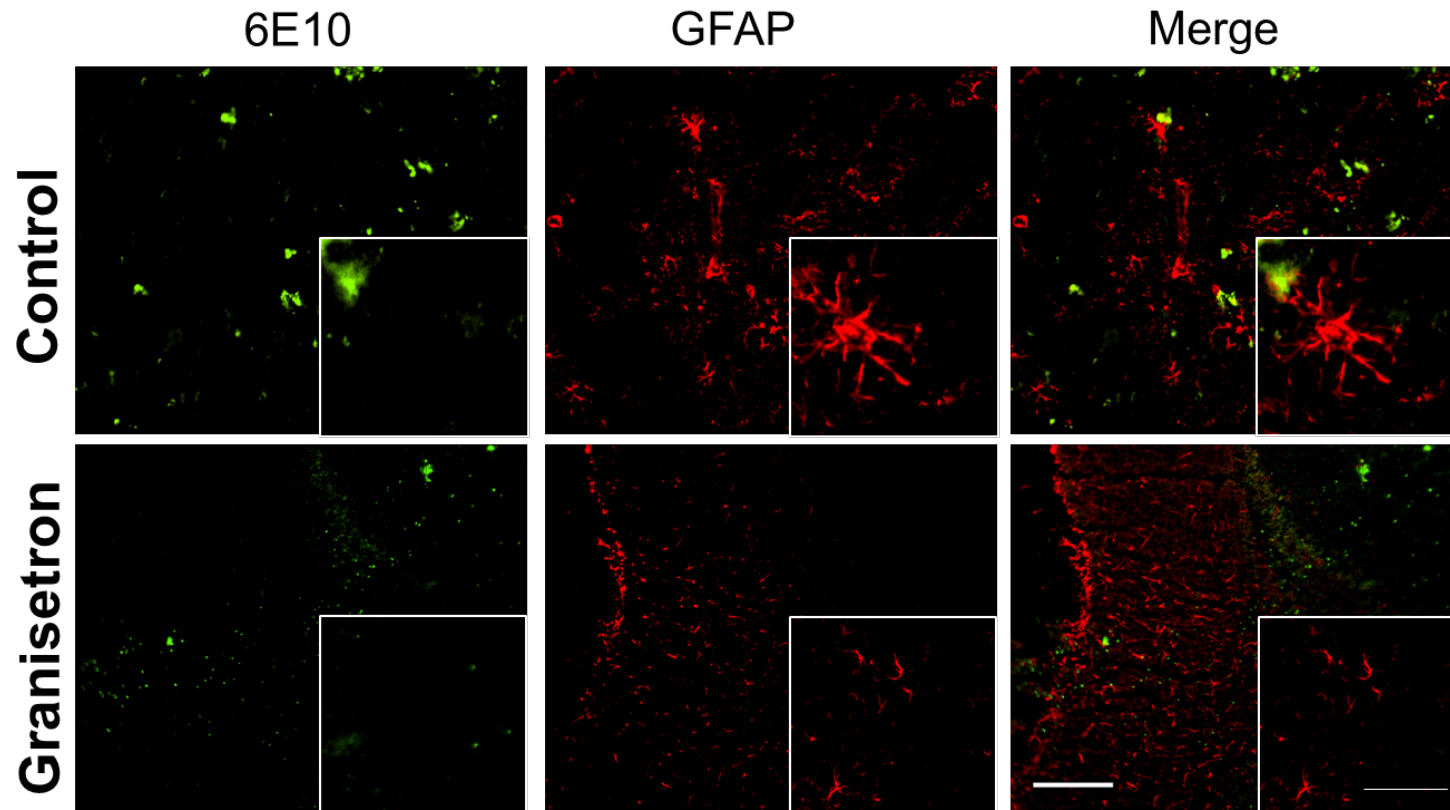

**Table S1:** A selection of significantly changed proteins in calcium pathway ( $P < 0.05$ ; fold change  $> 2$ ) for granisetron effect in C57Bl/6J wild-type mice as determined by IPA analysis.

| Symbol   | Entrez Gene Name                                               | Symbol in pathway | Experimental P-value | Experimental Fold Change | Expected | Location        | Type        |
|----------|----------------------------------------------------------------|-------------------|----------------------|--------------------------|----------|-----------------|-------------|
| CACNA2D2 | calcium voltage-gated channel auxiliary subunit alpha2 delta 2 | CaCn              | 0.00009              | -2.46                    |          | Plasma Membrane | ion channel |
| CACNG8   | calcium voltage-gated channel auxiliary subunit gamma 8        | CaCn              | 0.0036               | 2.42                     |          | Plasma Membrane | ion channel |
| CAMK4    | calcium/calmodulin dependent protein kinase IV                 | CAMK IV           | 0.00012              | -2.23                    | Up       | Nucleus         | kinase      |
| CAMK2G   | calcium/calmodulin dependent protein kinase II gamma           | CAMK II           | 0.0009               | 2.22                     | Up       | Cytoplasm       | kinase      |
| GNA13    | G protein subunit- $\alpha$ 13                                 | G $\alpha$        | 0.0022               | -2.16                    |          | Plasma Membrane | enzyme      |
| GNAL     | G protein subunit- $\alpha$ L                                  | G $\alpha$        | 0.0017               | -2.61                    |          | Cytoplasm       | enzyme      |
| GNB1     | G protein subunit- $\beta$ 1                                   | G $\beta$         | 0.00009              | 2.36                     |          | Plasma Membrane | enzyme      |
| GRIA2    | glutamate ionotropic receptor AMPA type subunit 2              | iGLUR             | 0.0019               | 2.19                     | Up       | Plasma Membrane | ion channel |
| GRID2    | glutamate ionotropic receptor $\delta$ type subunit 2          | iGLUR             | 0.00009              | -5.08                    | Up       | Plasma Membrane | ion channel |
| ITPR1    | inositol 1,4,5-tris-phosphate receptor type 1                  | IP3R              | 0.00009              | -2.88                    | Up       | Cytoplasm       | ion channel |
| PLCB3    | phospholipase C $\beta$ 3                                      | PLC               | 0.00028              | -2.42                    | Up       | Cytoplasm       | enzyme      |
| PLCB4    | phospholipase C $\beta$ 4                                      | PLC               | 0.00009              | -2.45                    | Up       | Cytoplasm       | enzyme      |
| PRKCA    | protein kinase C $\alpha$                                      | PKC               | 0.0042               | 2.16                     | Up       | Cytoplasm       | kinase      |
| PRKCD    | protein kinase C $\delta$                                      | PKC               | 0.00011              | 2.25                     | Up       | Cytoplasm       | kinase      |
| RPS6KA1  | ribosomal protein S6 kinase A1                                 | p90RSK            | 0.0031               | -2.35                    | Up       | Cytoplasm       | kinase      |

**Table S2:** A selection of significantly changed proteins in CREB pathway ( $P < 0.05$ ; fold change  $> 2$ ) for granisetron effect in C57Bl/6J wild-type mice as determined by IPA analysis

| Symbol   | Entrez Gene Name                                              | Symbol in pathway | Experimental P-value | Experimental Fold Change | Expected | Location        | Type                    |
|----------|---------------------------------------------------------------|-------------------|----------------------|--------------------------|----------|-----------------|-------------------------|
| ATP2B1   | ATPase plasma membrane Ca <sup>2+</sup> transporting 1        | PMCA              | 0.0016               | 2.17                     | Up       | Plasma Membrane | transporter             |
| CACNA2D2 | calcium voltage-gated channel auxiliary subunit alpha2delta 2 | VGCC              | 0.00009              | -2.46                    | Up       | Plasma Membrane | ion channel             |
| CACNG8   | calcium voltage-gated channel auxiliary subunit gamma 8       | VGCC              | 0.0036               | 2.42                     | Up       | Plasma Membrane | ion channel             |
| CAMK4    | calcium/calmodulin dependent protein kinase IV                | CAMK IV           | 0.00012              | -2.23                    | Up       | Nucleus         | kinase                  |
| CAMK2G   | calcium/calmodulin dependent protein kinase II gamma          | CAMK II           | 0.0009               | 2.22                     | Up       | Cytoplasm       | kinase                  |
| CAMKK1   | calcium/calmodulin dependent protein kinase kinase 1          | CAMKK             | 0.00065              | 2.28                     | Up       | Cytoplasm       | kinase                  |
| GRIA2    | glutamate ionotropic receptor AMPA type subunit 2             | AMPA              | 0.0019               | 2.19                     | Up       | Plasma Membrane | ion channel             |
| HDAC6    | histone deacetylase 6                                         | HDAC              | 0.0024               | 2.19                     |          | Nucleus         | transcription regulator |
| ITPR1    | inositol 1,4,5-trisphosphate receptor type 1                  | IP3R              | 0.00009              | -2.88                    | Up       | Cytoplasm       | ion channel             |
| PPP3CA   | protein phosphatase 3 catalytic subunit $\alpha$              | CALM              | 0.0059               | 2.2                      | Up       | Cytoplasm       | phosphatase             |
| RAP2B    | RAP2B, member of RAS oncogene family                          | RAP               | 0.0032               | -2.18                    | Up       | Plasma Membrane | enzyme                  |
